# Supplementary material
Source: Springer Nature journal article supplement (https://www.springermedizin.de/resource/supplementary/12885_2013_3926_MOESM9_ESM.pdf/9464788)

SELECTION OF THE MOST EFFECTIVE DOSES AND SCHEDULE OF PRI-2191 AND PRI-2205 ADMINISTRATION

| Mouse colon cancer model                 | MC38                    |     |     |      |          |     |     |
|------------------------------------------|-------------------------|-----|-----|------|----------|-----|-----|
| Route of tumor transplantation           | s.c.                    |     |     |      |          |     |     |
| I. Treatment with vit. D analogs         | Five times a week s.c.  |     |     |      |          |     |     |
| Analogs tested                           | PRI-2191                |     |     |      | PRI-2205 |     |     |
| Dose of analogs (µg/kg/day)              | 0.2                     |     |     |      | 20.0     |     |     |
| Effects of combined treatment with 5-FU: |                         |     |     |      |          |     |     |
| Tumor volume                             | ↔                       |     |     |      | ↑        |     |     |
| Life span                                | ↔                       |     |     |      | ↑        |     |     |
| Toxicity                                 | n/o                     |     |     |      | n/o      |     |     |
| II. Treatment with vit. D analogs        | Three times a week s.c. |     |     |      |          |     |     |
| Analogs tested                           | PRI-2191                |     |     |      | PRI-2205 |     |     |
| Dose of analogs (µg/kg/day)              | 2.0                     | 1.0 | 0.5 | 0.25 | 10.0     | 5.0 | 2.5 |
| Effects of combined treatment with 5-FU: |                         |     |     |      |          |     |     |
| Tumor volume                             | ↑                       | ↑   | ↓   | ↓    | ↑        | ↓   | ↓   |
| Life span                                | ↓                       | ↑   | ↑   | ↑    | ↑        | ↓   | ↑   |
| Toxicity                                 | o                       | n/o | n/o | n/o  | n/o      | n/o | n/o |

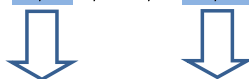

FURTHER STUDIES WITH SELECTED DOSES AND SCHEDULE OF PRI-2191 AND PRI-2205 ADMINISTRATION

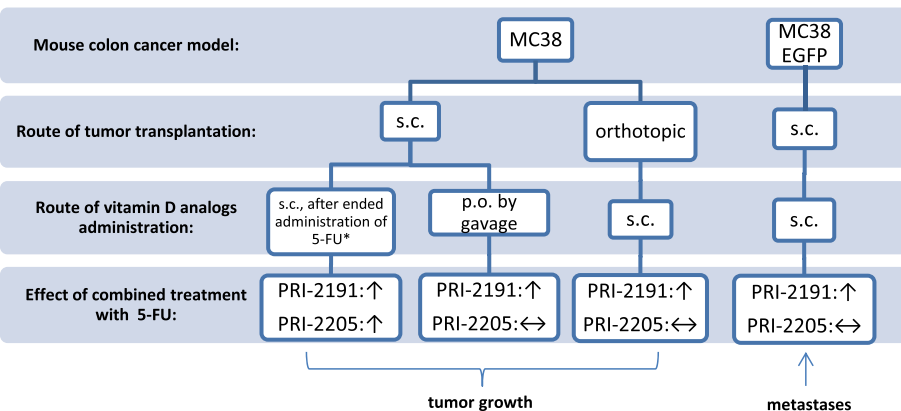

Supplement: MOESM9 [file 9464788]
